# Supplementary material
Source: PubMed Central journal article supplement (PMC2981607)

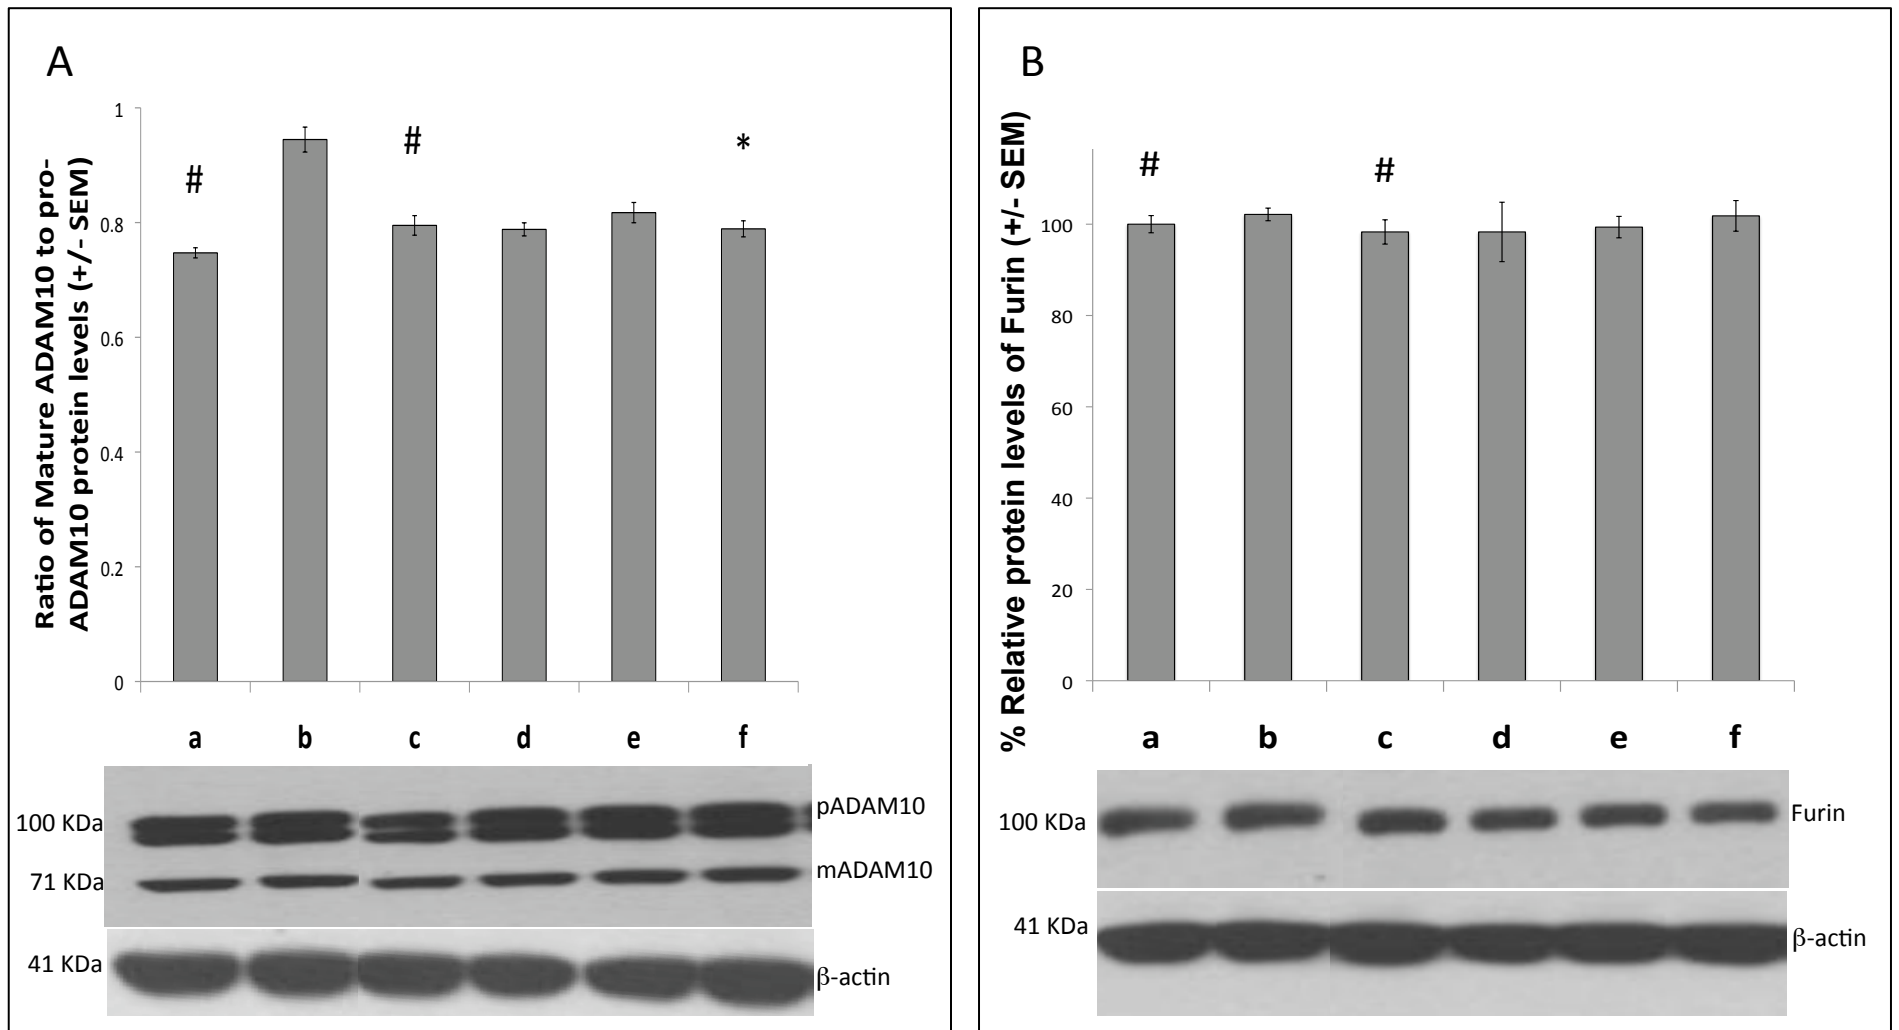

Fig. S1

Supplement: NIHMS236862-supplement-01.pdf [file NIHMS236862-supplement-01.pdf]
